# Supplementary material for: Physiological and proteome studies of maize (Zea mays L.) in response to leaf removal under high plant density
Source: PubMed Central journal article supplement (PMC6310946; doi:10.1186/s12870-018-1607-8), 2018-12-29
Supplement: 12870_2018_1607_MOESM6_ESM.pdf [file 12870_2018_1607_MOESM6_ESM.pdf]

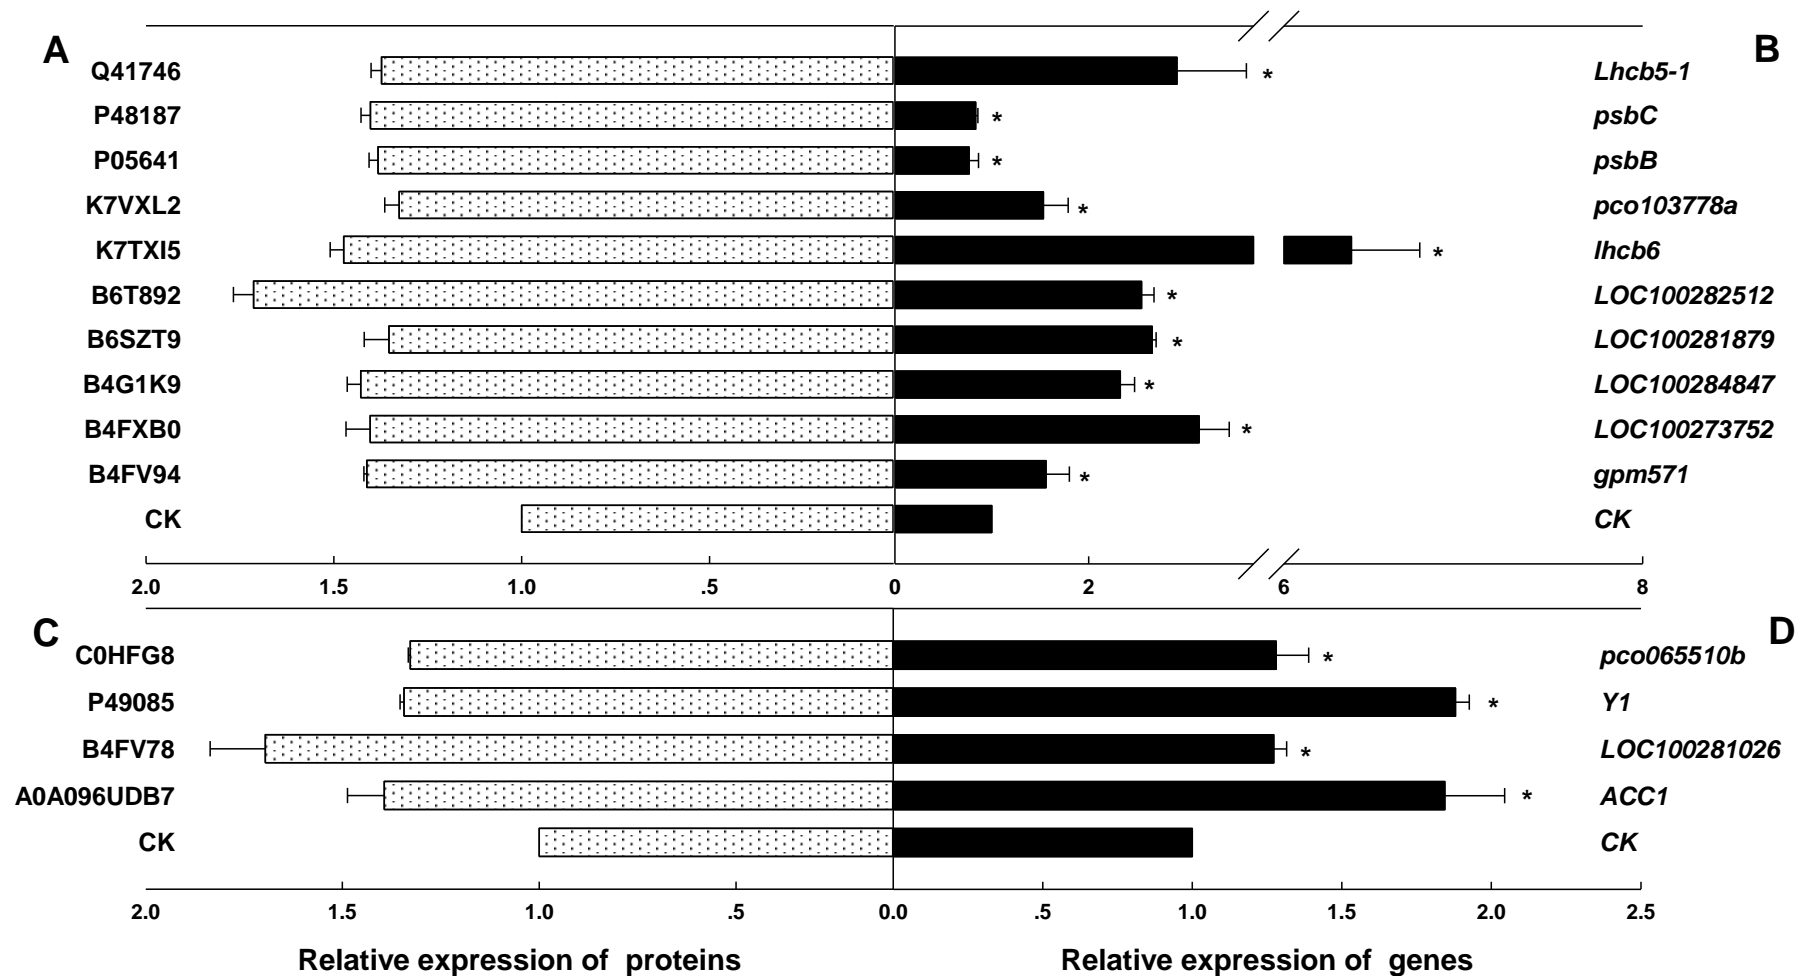

**Figure S3.** Effects of leaf removal on relative expression of photosynthesis related proteins (A), the corresponding encoding genes (B) in S<sub>2</sub> and relative expression of fatty acid metabolism related proteins (C) and the encoding genes (D) in S<sub>4</sub>, compared to S<sub>0</sub> respectively. The gene candidates are selected by proteins which accumulate in photosynthesis and fatty acid biosynthetic process terms in Fig 4. S<sub>0</sub> refers to no leaf removal (control); S<sub>2</sub> and S<sub>4</sub> refer to the removal of two or four uppermost leaves, respectively. Data are means  $\pm$  SE (n = 3). \* indicate the significant difference at  $P \leq 0.05$  level compared to S<sub>0</sub>.
